# Supplementary material for: Facile preparation of supramolecular ionogels exhibiting high temperature durability as solid electrolytes
Source: Royal Society of Chemistry journal article supplement (doi:10.1039/c5nj02432c), 2015-11-10
Supplement: c5nj02432c1.pdf [file c5nj02432c1.pdf]

*Supporting Information for*

## **Facile Preparation of Supramolecular Ionogels Exhibiting High Temperature Durability as Solid Electrolytes**

Tao Zhou, Xinpei Gao, Fei Lu, Na Sun, Liqiang Zheng\*

*Key laboratory of Colloid and Interface Chemistry, Shandong University, Ministry of  
Education, Jinan, 250100, P. R. China*

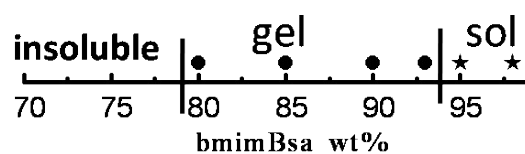

**Fig. S1** Phase diagram of Fe-H<sub>3</sub>BTC-bmimBsa mixture.

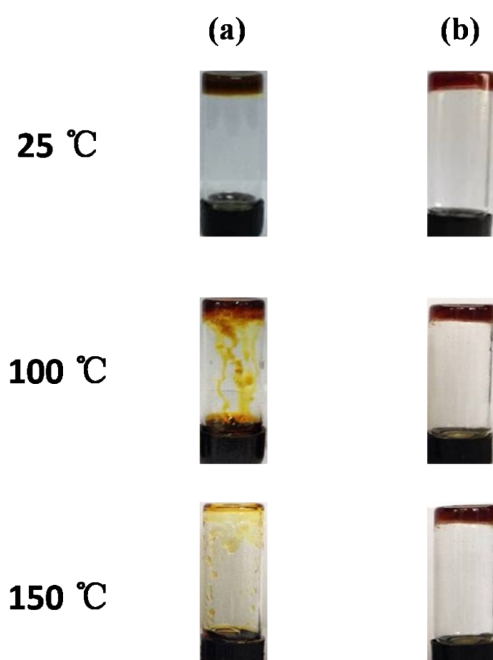

**Fig. S2** Images of supramolecular ionogels (a) Fe-H<sub>3</sub>BTC-90%bmimCl and (b) Fe-H<sub>3</sub>BTC-90%bmimBsa at different temperatures.

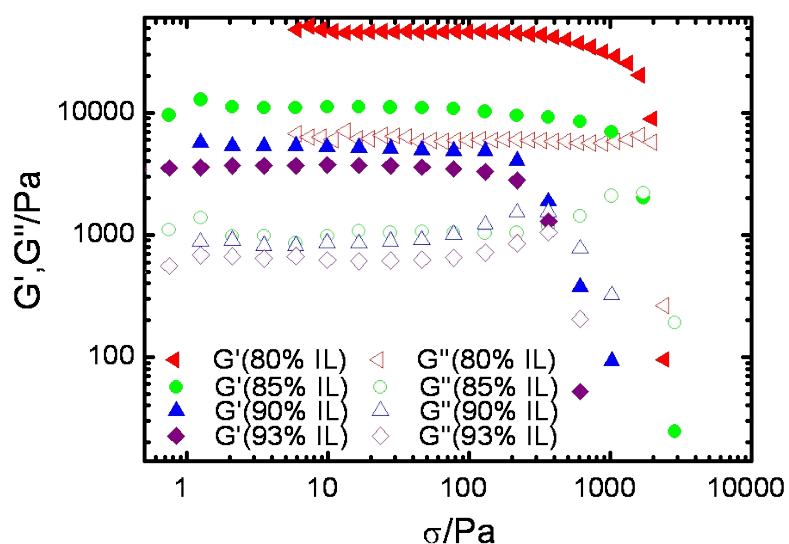

**Fig. S3** The  $G'$  and  $G''$  of ionogels Fe- $H_3$ BTC-bmimBsa as a function of the applied stress at a constant frequency of 1 Hz at 25.0°C with the ionic liquid content varying from 80 wt% to 93 wt%.

| Ionic liquid content | Temperature (°C) | Conductivity (mS/ cm) | Ionic liquid content | Temperature (°C) | Conductivity (mS/ cm) |
|----------------------|------------------|-----------------------|----------------------|------------------|-----------------------|
| 80%                  | 20               | 0.0384±0.0004         | 85%                  | 20               | 0.1167±0.0013         |
|                      | 40               | 0.1148±0.0009         |                      | 40               | 0.3455±0.0038         |
|                      | 60               | 0.3039±0.0045         |                      | 60               | 0.6723±0.0115         |
|                      | 80               | 0.6561±0.0050         |                      | 80               | 1.0108±0.0093         |
|                      | 100              | 1.3029±0.0039         |                      | 100              | 1.2440±0.0077         |
|                      | 120              | 2.0867±0.0021         |                      | 120              | 1.3648±0.0075         |
|                      | 140              | 2.8034±0.0015         |                      |                  |                       |
| 90%                  | 20               | 0.1077±0.0018         | 93%                  | 20               | 0.1253±0.0022         |
|                      | 40               | 0.2963±0.0057         |                      | 40               | 0.3665±0.0071         |
|                      | 60               | 0.6122±0.0069         |                      | 60               | 0.7073±0.0062         |
|                      | 80               | 0.9497±0.0082         |                      | 80               | 1.0399±0.0004         |
|                      | 100              | 1.2375±0.0041         |                      | 100              | 1.2213±0.0284         |
|                      | 120              | 1.4427±0.0195         |                      | 120              | 1.3931±0.0030         |
|                      | 140              | 1.5276±0.0178         |                      |                  |                       |

**Table. S1** The ionic conductivities of ionogel Fe-H<sub>3</sub>BTC-bmimBsa with different ionic liquid content.
